# Supplementary material for: Minimum inhibitory concentration of nano-silver bactericides for beneficial microbes and its effect on Ralstonia solanacearum and seed germination of Japanese Cucumber (Cucumis sativus)
Source: PubMed Central journal article supplement (PMC6431134; doi:10.7717/peerj.6418), 2019-03-20
Supplement: peerj-07-6418-s001.pdf [file peerj-07-6418-s001.pdf]

Raw Data used for seed germination

| Treatments | Replication | Seed germination |
|------------|-------------|------------------|
| T1         | R1          | 75               |
| T1         | R2          | 100              |
| T1         | R3          | 75               |
| T1         | R4          | 100              |
| T2         | R1          | 100              |
| T2         | R2          | 100              |
| T2         | R3          | 100              |
| T2         | R4          | 100              |
| T3         | R1          | 100              |
| T3         | R2          | 100              |
| T3         | R3          | 100              |
| T3         | R4          | 100              |
| T4         | R1          | 100              |
| T4         | R2          | 100              |
| T4         | R3          | 100              |
| T4         | R4          | 100              |
| T5         | R1          | 75               |
| T5         | R2          | 100              |
| T5         | R3          | 75               |
| T5         | R4          | 50               |
